# Supplementary material for: Anchoring of Ag6Si2O7 nanoparticles on α-Fe2O3 short nanotubes as a Z-scheme photocatalyst for improving their photocatalytic performances
Source: Royal Society of Chemistry journal article supplement (doi:10.1039/c6dt02499h), 2016-01-01
Supplement: c6dt02499h1.pdf [file c6dt02499h1.pdf]

## *Supporting Information*

# Anchoring of Ag<sub>6</sub>Si<sub>2</sub>O<sub>7</sub> Nanoparticles on α-Fe<sub>2</sub>O<sub>3</sub> Short Nanotubes as Z-Scheme Photocatalyst for Improving Their Photocatalytic Performances

*Jun Liu*<sup>1,2</sup>, *Wei Wu*<sup>2\*</sup>, *Qingyong Tian*<sup>1,2</sup>, *Zhigao Dai*<sup>2</sup>, *Zhaohui Wu*<sup>2</sup>, *Xiangheng Xiao*<sup>1\*</sup>, *Changzhong Jiang*<sup>1\*</sup>

<sup>1</sup>Key Laboratory of Artificial Micro- and Nano-structures of Ministry of Education, School of Physics and Technology, Wuhan University, Wuhan 430072, P. R. China

<sup>2</sup>Laboratory of Printable Functional Nanomaterials and Printed Electronics, School of Printing and Packaging, Wuhan University, Wuhan 430072, P. R. China

**Table S1** The parameters on spectral distribution and relative intensity of the used mercury lamp in the photocatalytic tests.

| Wavelength (nm)        | 250 | 313 | 365 | 400 | 510 | 620 | 720 |
|------------------------|-----|-----|-----|-----|-----|-----|-----|
| Relative Intensity (%) | 20  | 85  | 100 | 30  | 20  | 40  | 80  |

### **The measurement of the intensity of the mercury lamp light (*I*)**

The intensity of this light is calculated as 29.02 mW/cm<sup>2</sup>. This result is measured by irradiatometer (FZ-A, Photoelectric Instrument Factory of Beijing Normal University, wavelength range (400-1000 nm)). Which are carried out in our previous report.<sup>1</sup> The light source is the 300 W high pressure mercury lamp, the intensity and wavelength distribution of this high pressure mercury lamp are shown

in **Table S2**. Only the light with 400, 510, 620 and 720 nm could be measured by irradiatometer (**Table S2**). According to the relative intensity of the light with different wavelength, the optical power  $I$  ( $\text{mW}\cdot\text{cm}^{-2}$ ) of each wavelength could be calculated corresponding. Total optical power  $I$  ( $\text{mW}\cdot\text{cm}^{-2}$ ) of this light is  $29.02 \text{ mW}\cdot\text{cm}^{-2}$ .

**Table S2** The parameters on spectral distribution and relative intensity of the used high pressure mercury lamp and their corresponding optical power  $I$  ( $\text{mW}\cdot\text{mL}^{-1}$ ) in the photocatalytic tests.

| <b>Wavelength (nm)</b>                                                       | 250  | 313  | 365  | 400  | 510   | 620  | 720  | <b>Total</b> |
|------------------------------------------------------------------------------|------|------|------|------|-------|------|------|--------------|
| <b>Relative Intensity (%)</b>                                                | 20   | 85   | 100  | 30   | 20    | 40   | 80   | /            |
| <b>Measured <math>I</math> (<math>\text{mW}\cdot\text{cm}^{-2}</math>)</b>   |      | /    |      |      | 13.15 |      |      | /            |
| <b>Calculated <math>I</math> (<math>\text{mW}\cdot\text{cm}^{-2}</math>)</b> | 1.55 | 6.58 | 7.74 | 2.32 | 1.55  | 3.09 | 6.19 | 29.02        |

#### References

1. J. Liu, S. Yang, W. Wu, Q. Tian, S. Cui, Z. Dai, F. Ren, X. Xiao, C. Jiang, *ACS Sustainable Chem. Eng.*, 2015, **3**, 2975-2984.
